# Supplementary material
Source: PubMed Central journal article supplement (PMC3083192)
Supplement: supp_M110.181156_jbc.M110.181156-1.pdf [file supp_M110.181156_jbc.M110.181156-1.pdf]

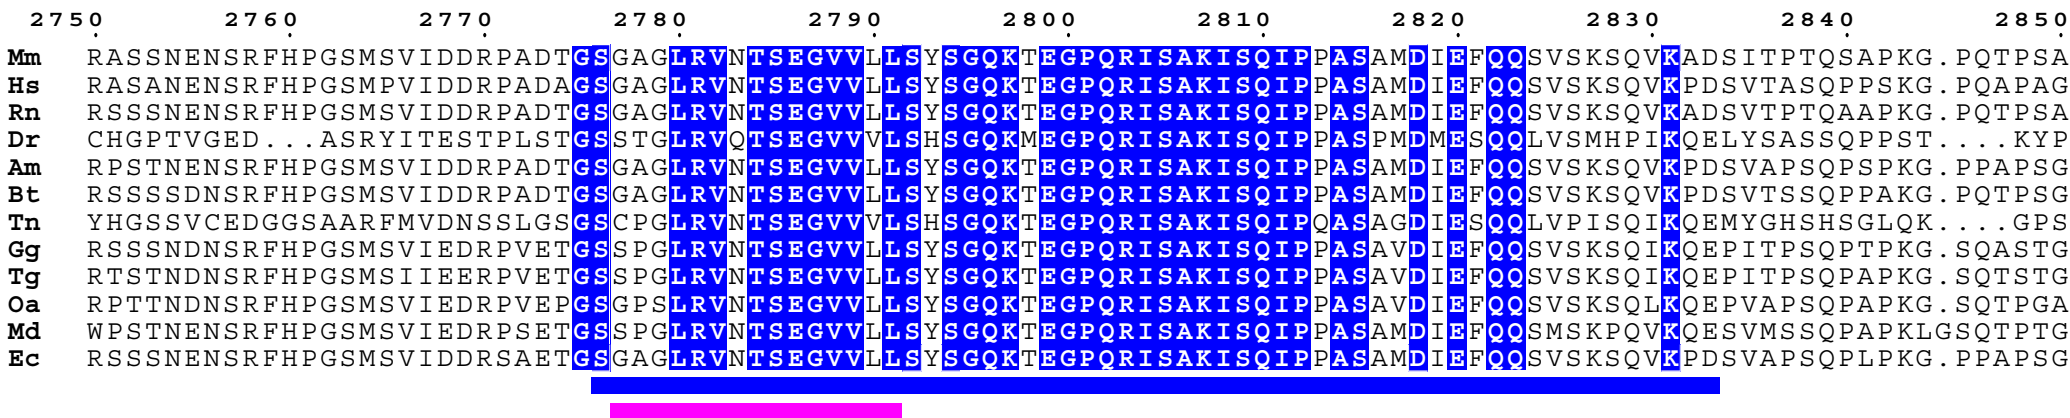

Figure S1. **Sequence alignment of MINT orthologs.** Figure shows sequence alignment for orthologous MINT proteins corresponding to the region that is necessary for interacting with CSL. Numbering corresponds to the *M. musculus* (Mm) ortholog used in this study. Absolutely conserved residues between all orthologs are colored blue. The blue and magenta bars beneath the sequence correspond to construct (2776-2833) used in this study and the region identified by Oswald et al. (2002) to be necessary for interacting with CSL, respectively.

Fig. S1

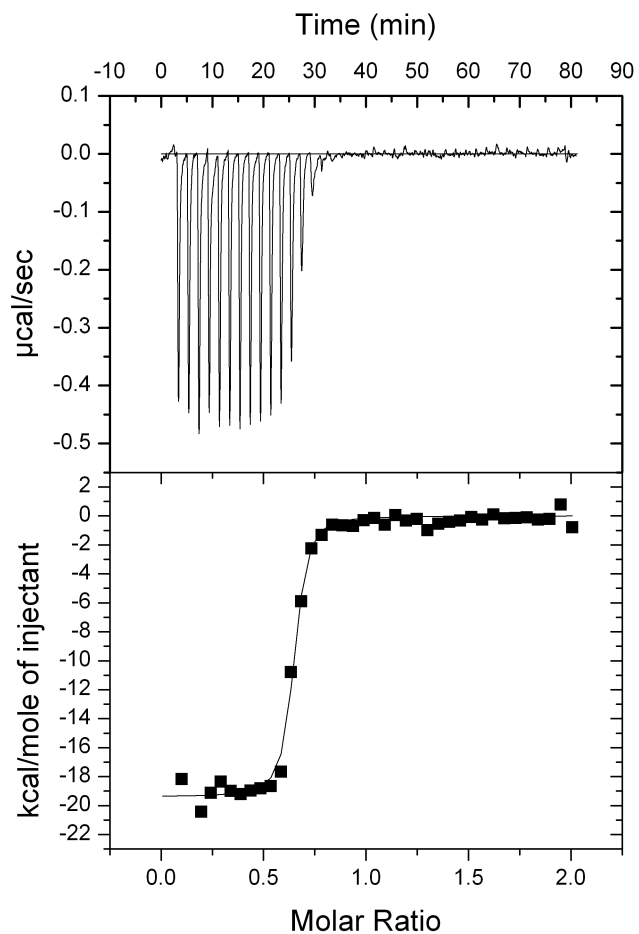

Figure S2. **CSL-MINT control ITC binding experiment.** Figure shows representative thermogram (raw heat signal and nonlinear least squares fit to the integrated data) of the complex formed by CSL and MINT (2776-2833), with CSL in the syringe and MINT in the cell.

Fig. S2

### Mint 2776-2833

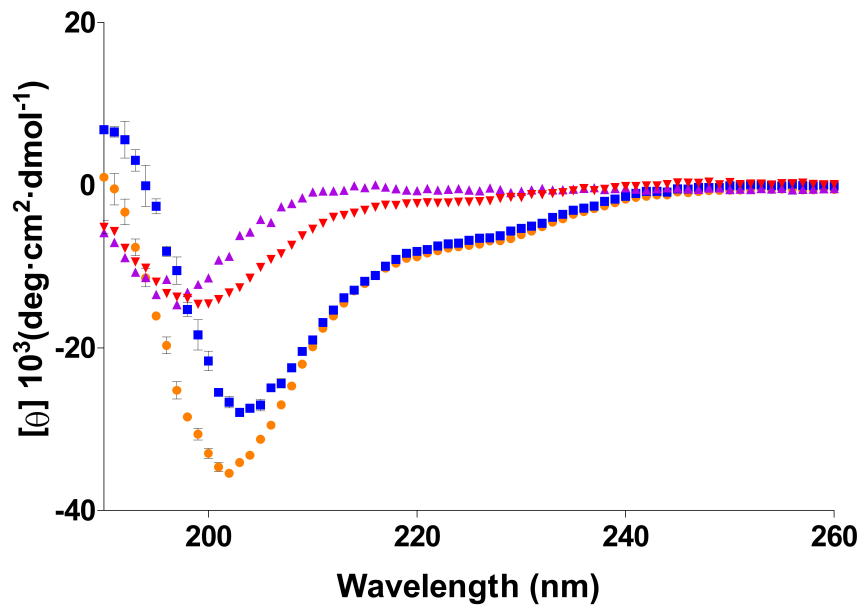

- SMT3-MINT:2776-2833 (65uM)
- SMT3 (61uM)
- 2776-2833 Peptide (85uM)
- SMT3Mint - SMT3

### Mint 2776-2820

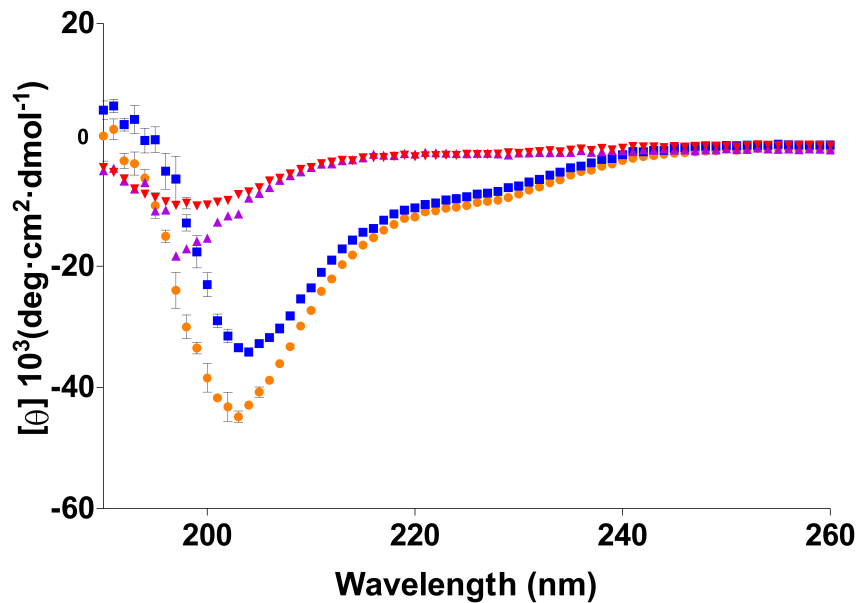

- SMT3-MINT:2776-2820 (95uM)
- SMT3 (94uM)
- 2776-2820 Peptide (100uM)
- SMT3MINT - SMT3

Figure S3. **Comparison of CD for MINT peptides and corresponding SMT3-MINT fusion proteins.** Experiments were performed as described in the Experimental Procedures. CD data are shown for MINT constructs (2776-2833), top, and (2776-2820), bottom. Construct concentrations for CD analysis are denoted. MINT and SMT3-MINT fusion proteins were analyzed in a buffer containing 50mM NaPi pH 6.5 and 150mM NaF. [SMT3MINT - SMT3] represent the calculated spectra from subtracting the collect SMT3 spectra from the corresponding SMT3-MINT fusion protein spectra.

# Fig. S3

|         | MINT               | K (M <sup>-1</sup> ) | Kd (μM)           | ΔG (kcal/mol) | ΔH (kcal/mol) | TΔS (kcal/mol) |
|---------|--------------------|----------------------|-------------------|---------------|---------------|----------------|
| CSL     | 2752 - 2833        | 1.87E+08 ± 1.01E+07  | 0.005 ± 0.00028   | -11.3 ± 0.032 | -14.8 ± 0.992 | -3.52 ± 1.007  |
|         | smt 2776 - 2833    | 1.21E+08 ± 2.00E+06  | 0.008 ± 0.0013    | -11.0 ± 0.010 | -18.0 ± 0.626 | -7.0 ± 0.626   |
|         | 2776 - 2833        | 9.39E+07 ± 1.19E+07  | 0.011 ± 0.0014    | -10.9 ± 0.078 | -14.6 ± 0.154 | -3.7 ± 0.164   |
|         | smt 2776 - 2820    | 3.77E+08 ± 1.09E+08  | 0.003 ± 0.0007    | -11.7 ± 0.165 | -19.3 ± 0.545 | -7.6 ± 0.698   |
|         | 2776 - 2820        | 5.80E+07 ± 1.17E+07  | 0.018 ± 0.0038    | -10.6 ± 0.124 | -10.0 ± 1.241 | 0.6 ± 1.280    |
|         | smt 2801 - 2833    | 5.49E+05 ± 7.53E+04  | 1.845 ± 0.2698    | -7.8 ± 0.084  | -7.4 ± 1.209  | 0.4 ± 1.169    |
|         | 2801 - 2833        | 1.13E+05 ± 1.41E+03  | 8.850 ± 0.1107    | -6.9 ± 0.007  | -11.3 ± 0.120 | -4.4 ± 0.148   |
|         | smt 2776 - 2800    | 2.45E+05 ± 1.87E+04  | 4.104 ± 0.3294    | -7.3 ± 0.047  | -4.9 ± 0.607  | 2.4 ± 0.591    |
|         | smt 2776 - 2812    | 1.39E+08 ± 4.92E+07  | 0.008 ± 0.0023    | -11.1 ± 0.196 | -14.0 ± 1.051 | -2.9 ± 1.246   |
|         | smt 2791 - 2812    | 9.43E+04 ± 1.28E+04  | 10.746 ± 1.5570   | -6.8 ± 0.084  | -10.6 ± 1.260 | -3.8 ± 1.346   |
|         | smt 2791 - 2820    | 8.21E+04 ± 1.83E+04  | 12.654 ± 3.1515   | -6.7 ± 0.141  | -12.8 ± 1.948 | -6.1 ± 2.075   |
|         | smt 2801 - 2820    | 1.71E+05 ± 7.35E+04  | 6.504 ± 2.3590    | -7.1 ± 0.240  | -19.0 ± 2.170 | -11.9 ± 2.232  |
| BTD     | 2776 - 2833        | 2.46E+04 ± 3.02E+03  | 41.044 ± 4.8050   | -6.0 ± 0.071  | -14.9 ± 3.573 | -8.9 ± 3.529   |
|         | 2801 - 2833        | 9.11E+04 ± 3.16E+04  | 11.804 ± 3.5800   | -6.7 ± 0.196  | -8.2 ± 1.606  | -1.4 ± 1.797   |
|         | smt 2776 - 2812    | NBD                  | NBD               | NBD           | NBD           | NBD            |
|         | smt 2791 - 2812    | NBD                  | NBD               | NBD           | NBD           | NBD            |
|         | smt 2791 - 2820 ** | 5.25E+04 ± 3.05E+04  | 23.338 ± 11.4040  | -6.2 ± 0.445  | -12.3 ± 4.685 | -6.1 ± 4.629   |
|         | smt 2801 - 2820    | 7.35E+04 ± 2.38E+04  | 14.458 ± 3.9470   | -6.6 ± 0.180  | -7.6 ± 1.450  | -1.0 ± 1.612   |
|         | smt 2776 - 2800    | NBD                  | NBD               | NBD           | NBD           | NBD            |
| CTD     | 2801 - 2833        | NBD                  | NBD               | NBD           | NBD           | NBD            |
|         | 2776 - 2833        | 1.68E+04 ± 2.21E+03  | 60.330 ± 7.8390   | -5.8 ± 0.078  | -7.7 ± 1.864  | -2.0 ± 1.946   |
|         | smt 2776 - 2800    | 8.82E+03 ± 2.50E+03  | 120.942 ± 40.3150 | -5.4 ± 0.186  | -12.7 ± 3.187 | -7.4 ± 3.368   |
| BTD-CTD | 2776 - 2833        | 1.04E+06 ± 1.18E+05  | 0.969 ± 0.1130    | -8.2 ± 0.069  | -14.2 ± 1.635 | -6.0 ± 1.672   |

### Supplemental Table I.

All experiments were performed at 25°C, except for the BTD/SMT(2791-2820) complex, which was performed at 15°C (\*\*). Values are the mean of at least three independent experiments and errors represent the standard deviations of multiple experiments. NBD = no binding detected.
